# Supplementary material for: Optimizing 5-hydroxymethylfurfural production from biomass carbohydrates: ionic liquid-catalyzed pathways in deep eutectic solvents under sonication and thermal conditions
Source: Royal Society of Chemistry journal article supplement (doi:10.1039/d4re00056k), 2024-01-01
Supplement: d4re00056k1.pdf [file d4re00056k1.pdf]

## Supplementary Information

### Optimizing 5-Hydroxymethylfurfural Production via Ionic Liquid-Catalysis in Deep Eutectic Solvents from Diverse Biomass-Derived Sources: A Study on Sonication and Thermal Conditions

Sabah Karimi<sup>a</sup>, Chen Binglin<sup>b</sup>, Hemayat Shekaari<sup>\*1a</sup>

<sup>a</sup> Department of Physical Chemistry, Faculty of Chemistry, University of Tabriz, Tabriz, Iran

<sup>b</sup> College of Energy, Xiamen University, Xiamen 361102, Fujian, China

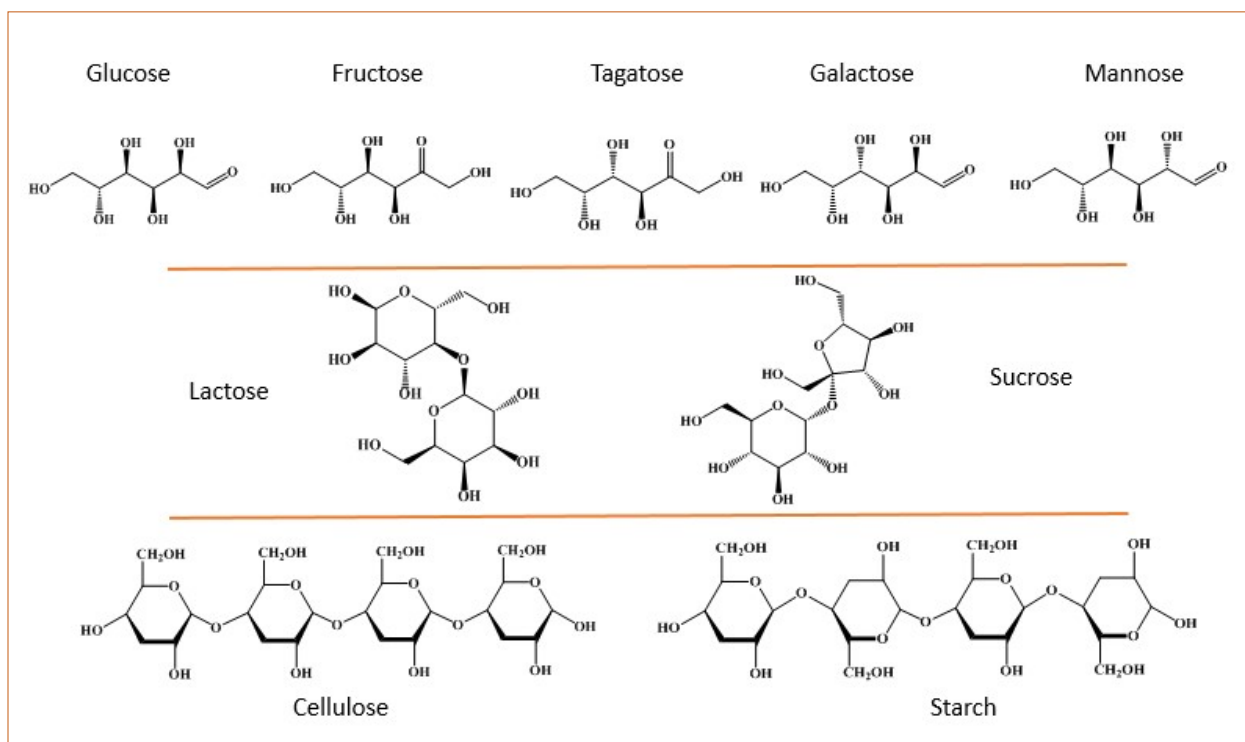

Fig. S1. Structural formula of biomass-derived carbohydrates used in this work.

### 1. Synthesis of DESs

<sup>1</sup> Hemayat Shekaari. Email : hemayatt@yahoo.com

Deep eutectic solvents (DES) are a type of ionic liquid formed by the complexation of a hydrogen bond donor and acceptor. These solvents have unique properties and are often used as environmentally friendly alternatives to traditional solvents. The synthesis of deep eutectic solvents typically involves mixing specific components in a certain molar ratio.

| DESs            | T(°C) | Time (min) |
|-----------------|-------|------------|
| ChCl/Gly (1:2)  | 80    | 15         |
| ChCl/EG (1:2)   | 80    | 15         |
| ChCl/Urea (1:2) | 80    | 20         |
| DMAC/Gly (1:2)  | 80    | 15         |
| DMAC/EG (1:2)   | 80    | 20         |
| DMAC/Urea (1:2) | 90    | 15         |
| TEAB/Gly (1:2)  | 80    | 15         |
| TEAB/EG (1:2)   | 80    | 15         |
| TEAB/Urea (1:2) | 90    | 20         |
| TPAB/Gly (1:2)  | 80    | 15         |
| TPAB/EG (1:2)   | 80    | 15         |
| TPAB/Urea (1:2) | 80    | 20         |
| TBAB/Gly (1:2)  | 80    | 15         |
| TBAB/EG (1:2)   | 80    | 15         |
| TBAB/Urea (1:2) | 80    | 20         |

## 2. Characterization of 5-HMF

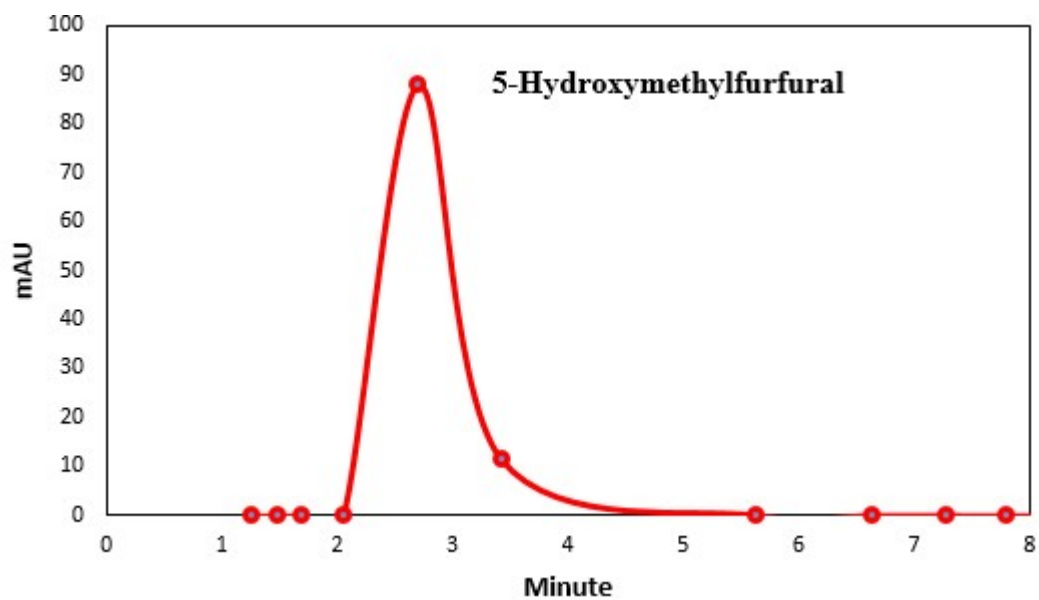

Fig. S2. HPLC analysis result of the isolated 5-HMF.

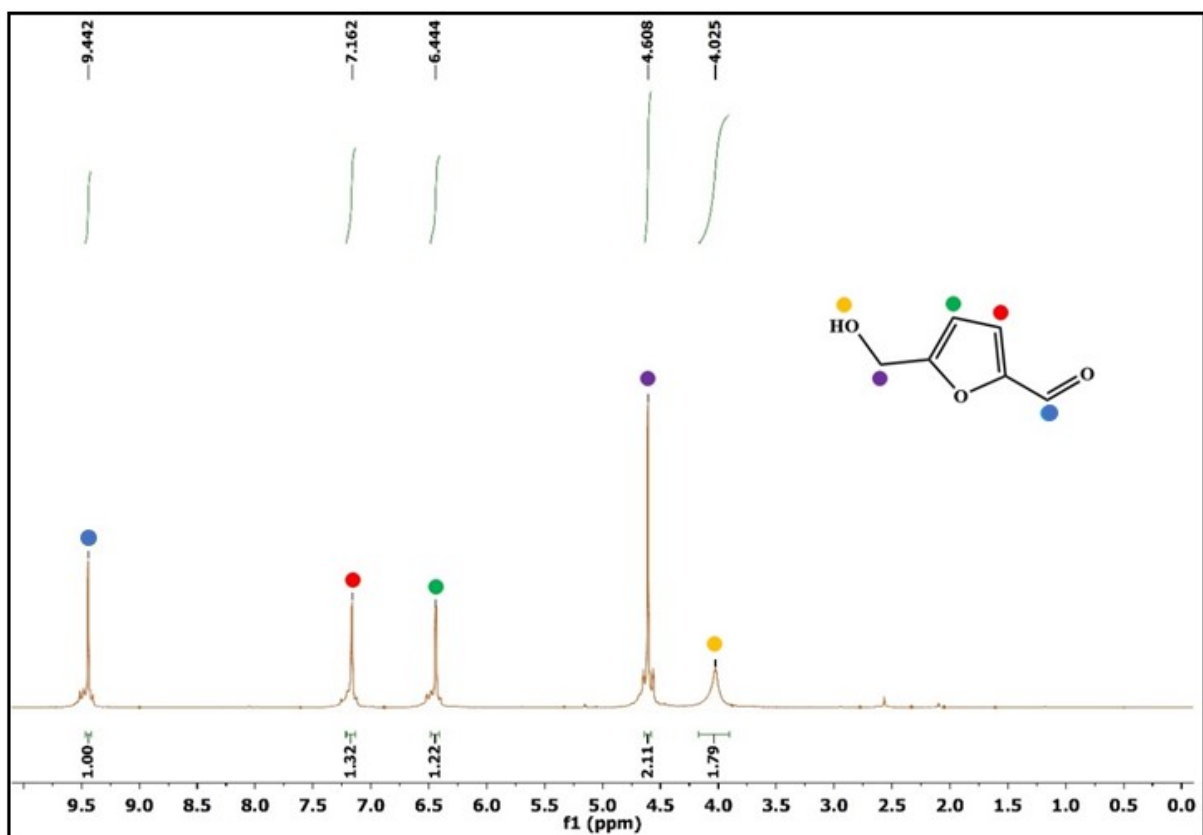

Fig. S3.  $^1\text{H}$  NMR spectrum of the isolated 5-HMF in  $\text{CDCl}_3$ .

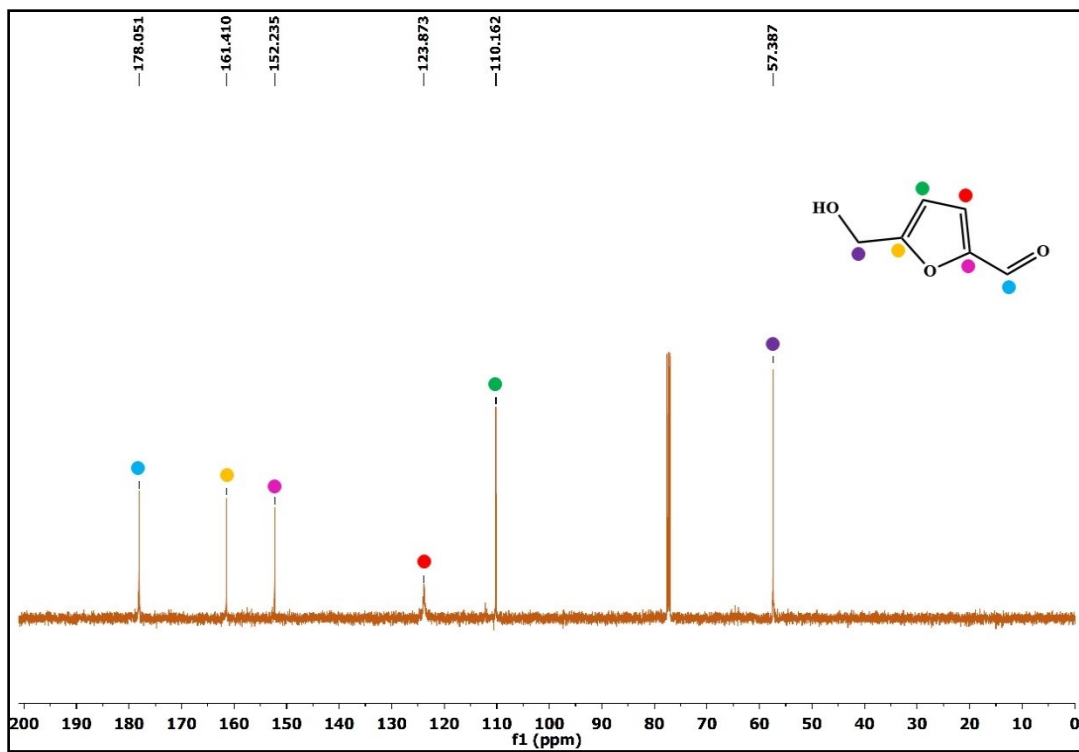

Fig. S4.  $^{13}\text{C}$  NMR spectrum of the isolated 5-HMF in  $\text{CDCl}_3$ .

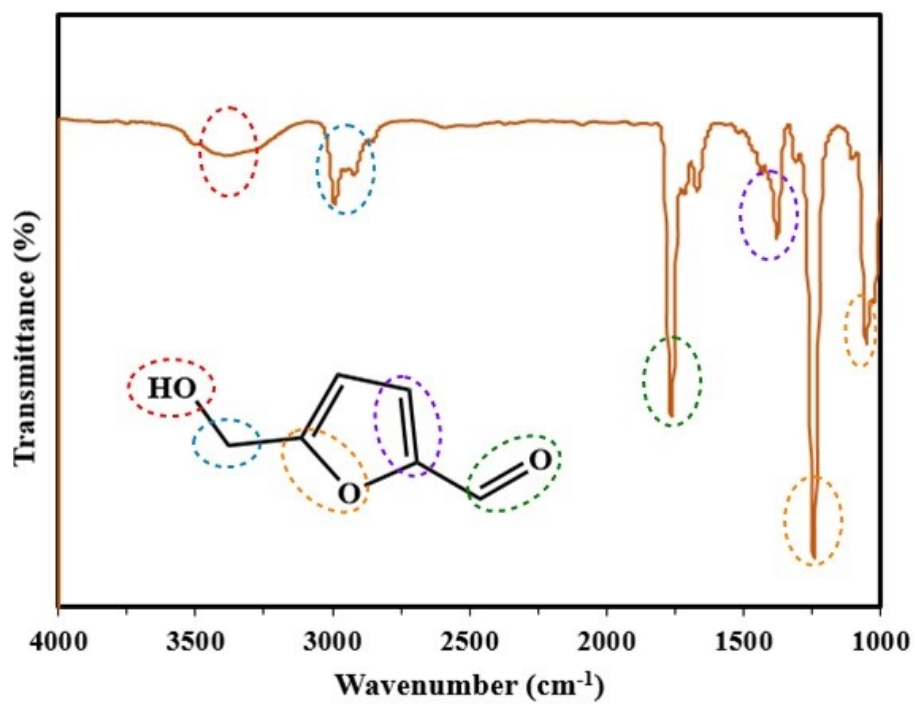

Fig. S5. FT-IR spectrum of the isolated 5-HMF.
